# Comparative analysis of Hox downstream genes in *Drosophila*

Stefanie D. Hueber<sup>1,\*</sup>, Daniela Bezdán<sup>1,\*</sup>, Stefan R. Henz<sup>2</sup>, Martina Blank<sup>1</sup>, Haijia Wu<sup>1</sup> and Ingrid Lohmann<sup>1,†</sup>

Functional diversification of body parts is dependent on the formation of specialized structures along the various body axes. In animals, region-specific morphogenesis along the anteroposterior axis is controlled by a group of conserved transcription factors encoded by the Hox genes. Although it has long been assumed that Hox proteins carry out their function by regulating distinct sets of downstream genes, only a small number of such genes have been found, with very few having direct roles in controlling cellular behavior. We have quantitatively identified hundreds of Hox downstream genes in *Drosophila* by microarray analysis, and validated many of them by in situ hybridizations on loss- and gain-of-function mutants. One important finding is that Hox proteins, despite their similar DNA-binding properties in vitro, have highly specific effects on the transcriptome in vivo, because expression of many downstream genes respond primarily to a single Hox protein. In addition, a large fraction of downstream genes encodes realizator functions, which directly affect morphogenetic processes, such as orientation and rate of cell divisions, cell-cell adhesion and communication, cell shape and migration, or cell death. Focusing on these realizators, we provide a framework for the morphogenesis of the maxillary segment. As the genomic organization of Hox genes and the interaction of Hox proteins with specific co-factors are conserved in vertebrates and invertebrates, and similar classes of downstream genes are regulated by Hox proteins across the metazoan phylogeny, our findings represent a first step toward a mechanistic understanding of morphological diversification within a species as well as between species.

**KEY WORDS:** *Drosophila*, Deformed, Morphogenesis, Realizators, Microarray, Hox downstream target genes

## INTRODUCTION

In animals, morphology along the various body axes is very diverse, requiring both a system that confers positional identity and a means to respond to these positional cues. It has long been known that the system specifying positional identity along the anteroposterior (AP) axis is based on an evolutionarily conserved set of regulators, the Hox genes (Carroll, 1995; Mann and Morata, 2000; McGinnis and Krumlauf, 1992). In *Drosophila*, Hox genes are expressed in defined domains along the AP axis, and their activity assigns distinct morphologies to the various body segments (McGinnis and Krumlauf, 1992). In addition, Hox genes are very often expressed in overlapping domains and crossregulate each other (McGinnis and Krumlauf, 1992; Miller et al., 2001). Consequently, loss of function of one Hox gene frequently leads to the ectopic expression of neighboring Hox genes, which is one of the reasons for the drastic homeotic transformations of body segments initially identified by Ed Lewis (Lewis, 1978). Therefore, only a subset of Hox functions can be identified in loss-of-function mutants.

Hox genes code for transcription factors with a highly conserved DNA-binding domain, the homeodomain (McGinnis et al., 1984; Scott and Weiner, 1984), and it has been postulated that Hox proteins direct morphogenesis by regulating appropriate sets of downstream genes in a segment-specific manner (Graba et al., 1997; Hombria and Lovegrove, 2003). Although a wide range of strategies has been used to identify Hox downstream genes (Graba et al., 1997; Hombria and Lovegrove, 2003; Pradel and White,

1998), our knowledge of their nature is still limited. Initial attempts have focused on in vitro studies or on heterologous systems; however, Hox proteins acquire DNA-binding specificity mostly through interactions with various co-factors in vivo (Ebner et al., 2005; Gebelein et al., 2004; Mahaffey, 2005; Mann, 1995; Mann and Affolter, 1998). Therefore, most known Hox downstream genes have been identified by candidate gene approaches based on expression patterns or similar mutant phenotypes (Pearson et al., 2005), highlighting the power of in vivo strategies to identify Hox target genes. This notion is further supported by recent successful approaches combining loss- or gain-of-function alleles of Hox genes and microarray experiments to identify Hox downstream genes on a larger scale (Cobb and Duboule, 2005; Hedlund et al., 2004; Lei et al., 2005; Williams et al., 2005). Still, most previous efforts were biased toward the identification of direct Hox target genes, and, while knowledge of direct Hox targets is a prerequisite to understanding how Hox proteins acquire DNA-binding specificity in vivo, we need to know the entire Hox-dependent regulatory network with all its tiers of regulatory interactions to understand how Hox proteins control morphogenesis on a cellular level.

Most of the known Hox downstream genes code either for transcription factors or for signaling molecules (Hombria and Lovegrove, 2003; Pearson et al., 2005). These two classes represent the top tiers of regulatory cascades and are able to coordinate many downstream events. Hence, they are not informative for elucidating the role of Hox proteins in the specification of morphological properties on a cellular level per se. To this end, the functional analysis of the so-called realizators, which directly influence the morphology by regulating cytodifferentiation processes (Garcia-Bellido, 1975; Pradel and White, 1998), is required. Unfortunately, even though the concept of realizators was postulated more than 30 years ago, so far very few Hox realizator genes have been identified and studied mechanistically (Bello et al., 2003; Lohmann et al., 2002). One

<sup>1</sup>Max Planck Institute for Developmental Biology, <sup>2</sup>Department of Molecular Biology, Spemanstrasse 37-39, D-72076 Tübingen, Germany.

\*These authors contributed equally to this work

†Author for correspondence (e-mail: ingrid.lohmann@tuebingen.mpg.de)

well-studied example of a realizator gene in *Drosophila* is the apoptosis-inducing gene *reaper* (*rpr*), which is expressed in the maxillary segment in *Drosophila* embryos and is directly controlled by the Hox protein Deformed (*Dfd*) (Lohmann et al., 2002). In addition, the *Dfd*-dependent expression of *rpr* and, consequently, the activation of apoptosis was shown to be necessary and sufficient for the maintenance of the boundary between the maxillary and mandibular segments of the embryonic head (Lohmann et al., 2002). This is one of the few examples demonstrating how a Hox protein can execute, via a single realizator gene, one specific aspect of segmental morphology on the cellular level. To understand and mechanistically link the many remaining Hox functions with morphogenetic outputs, we need to quantitatively identify Hox downstream genes. Functional analysis of this set will then allow us to elucidate all tiers of interactions within the Hox-regulatory network, and to establish links between Hox genes and realizator genes. This seems fundamental for a complete understanding of the role of Hox genes in development and evolution.

## MATERIALS AND METHODS

### *Drosophila* genetics

The wild-type strain used was Oregon-R. UAS-*lacZ*, UAS-*Dfd*, UAS-*Antp* and *arm-GAL4* strains were from W. McGinnis, UAS-*Scr*, UAS-*Ubx* and UAS-*Abd-B* from F. Hirth (Hirth et al., 2001), UAS-*Abd-A* from A. M. Michelson (Michelson, 1994) and UAS-*hep<sup>act</sup>* from M. Mlodzik (Weber et al., 2000). For trans-heterozygous mutants the following alleles were used: *Dfd<sup>r11</sup>* and *Dfd<sup>w21</sup>* from W. McGinnis; *Scr<sup>l</sup>*, *Scr<sup>4</sup>*, *Abd-B<sup>M2</sup>*, *wg<sup>l-12</sup>* and *wg<sup>l-17</sup>* from the Bloomington Stock Center; and *Abd-B<sup>M5</sup>* from C. Nüsslein-Volhard (Tübingen *Drosophila* Stock Collection). *Dfd* mutant embryos for BrdU staining were *Dfd<sup>w21</sup>/TM3Sb[twi::GFP]* crossed to *Dfd<sup>r11</sup>/TM3Sb[twi::GFP]* and homozygous *Dfd* mutants (*Dfd<sup>w21</sup>/Dfd<sup>r11</sup>*) were identified by absence of GFP signal.

### Plasmids

cDNAs were from the *Drosophila* Genomics Resource Center: *CG5080* (LD34147), *CG7447* (LD16414), *disco* (GH27656), *Dll* (LP01770), *ImpL2* (SD07266), *gt* (RE29225), *sage* (RE59356), *skl* (RE14076), *spz* (SD07354), *LysE* (LP07339), *CG8193* (GH07976), *CG3097* (RE43153), *Mp20* (RE55741), *CG17052* (LD43683), *Ance* (LD11258), *Hsp23* (LD06759), *sn* (RH62992), *mas* (LP06006), *pav* (RE22456), *wrapper* (GH03113), *wg* (RE02607) and *W* (AT13267). *prd* cDNA was from W. McGinnis, *Eip63E* cDNA and predicted *Dfd* response elements tested by EMSA were PCR amplified, cloned and sequenced. Expression plasmids for *Dfd* and *Ubx* were obtained from W. McGinnis and S. Carroll, respectively.

### Histology and scanning electron microscopy

In situ hybridization and immunocytochemistry were performed as described (Bergson and McGinnis, 1990; Tautz and Pfeifle, 1989), and BrdU labeling and scanning electron microscopy were done as described (Dolbeare and Selden, 1994; Lohmann et al., 2002). Hox protein expression was measured by the fluorescent intensity of a standardized area of individual nuclei using the Zeiss LSM 510 META confocal microscope. Twenty nuclei of four independent embryos were analyzed for each expression domain and genotype. Antibodies were: anti-*Dfd*, W. McGinnis; anti-*Scr*, anti-*Antp*, anti-*Abd-B* and anti-*wg*, Developmental Studies Hybridoma Bank (Iowa, University), anti-*Ubx*, R. White (Cambridge); anti-*Abd-A*, I. W. Duncan (Washington, University); anti-GFP, Torrey Pines Biolabs (Houston); anti-BrdU, Roche; anti-mouse AlexaFluor 488, anti-guinea pig AlexaFluor 488 and anti-rabbit AlexaFluor 488, Molecular Probes.

### Microarray experiments

Microarray hybridizations were carried out as described (Schmid et al., 2003) in biological triplicates with RNA from pools of stage 11 or stage 12 embryos. Raw data were quantile normalized and expression estimates were calculated using gcRMA (Wu et al., 2004) implemented in R. Statistical testing for differential expression was carried out using LogitT (Lemon et

al., 2003). Microarray data discussed here have been deposited with ArrayExpress database at the EBI (<http://www.ebi.ac.uk/arrayexpress-old/>; Accession number E-MEXP-879). For analysis of gene ontology categories, GO lists from FlyBase were used. Genes were sorted using a combination of molecular and biological GO terms. Genes containing the following description in their GO annotations were classified as realizators: apoptosis, cell death, cell adhesion, cell shape, cell cycle, mitosis, cell proliferation, cytoskeleton, proteolysis, peptidolysis, cytoskeleton, structural constituent of larval cuticle or peritrophic membrane.

### Quantitative real-time PCR

Quantitative real-time PCR (qRT-PCR) was carried out in triplicates from RNA of pooled tissue as described (Schmid et al., 2003) using SYBR-green QPCR Master Mix (Invitrogen). Expression of  $\beta$ -*Tubulin* was used for cross-experiment normalization. Primer and probe sequences are available upon request.

### Bioinformatics

For cluster identification the Cis-Analyst algorithm (Berman et al., 2004) was used with a Position-Frequency-Matrix (PFM) based on DNaseI footprint data (Bergman et al., 2005) and consensus sequences from the literature. The PFM shown in Fig. S1B in the supplementary material was generated by PATSER. To define enhancer parameters, such as length of enhancer, number of *Dfd*-binding sites per enhancer, distance between binding sites, known *Dfd*-dependent enhancers were analyzed. The parameters identified, as shown in Fig. S1B in the supplementary material, were used to predict clusters of *Dfd*-binding sites in the regulatory regions of selected genes in *Drosophila melanogaster*. To this end, intergenic and intronic sequences of *D. melanogaster* were aligned to a multiple sequence file, sorted and separated to segment-files, which included annotation information. The PATSER program used these segment-files as a template to generate *P*-values for each *Dfd*-binding site identified according to the PFM. Using this binding site information, clusters of *Dfd*-binding sites were predicted using the standalone version of cis-Analyst-helper. To validate this approach statistically and to optimize the parameters chosen, *Dfd* downstream genes identified in the microarray experiment were used. The logic of this approach is based on the assumption that direct *Dfd* target genes should be enriched among the *Dfd* downstream genes identified in the microarray experiment when compared with randomly selected genes. To identify *Dfd* clusters in other *Drosophila* species (*D. simulans*, *D. yakuba*, *D. erecta*, *D. pseudoobscura*), a NCBI BLAST search was performed. To consider clusters as being conserved, the following conservation criteria had to be fulfilled: (1) conservation of the enhancer in at least two other *Drosophila* species; (2) the length of the homologous enhancer had to be  $\geq 50\%$  of the enhancer length identified in *D. melanogaster*; (3) conservation of at least two *Dfd*-binding sites within the conserved enhancer elements; and (4) conserved enhancers with less than 50% of length conservation but more than two *Dfd*-binding sites conserved were treated as minor hits. Conserved enhancers were ranked according to the following parameters: (1) evolutionary distance of *Drosophila* species; (2) overall sequence similarity of conserved enhancers; (3) numbers of binding sites present in conserved clusters; and (4) degree of variation in enhancer length. Binding site matches for other transcription factors located in the Hox response elements were identified by using rVISTA, Transfac and Jasper databases.

### Electrophoretic mobility shift assays

Electrophoretic mobility shift assays (EMSAs) were performed as described (Lohmann et al., 2002).

## RESULTS

### Identification of Hox responsive genes by microarray analysis

In order to systematically elucidate Hox-regulatory networks, we performed a comparative microarray screen using stage 11 and stage 12 embryos ubiquitously overexpressing six out of eight Hox genes – *Dfd*, *Sex combs reduced* (*Scr*), *Antennapedia* (*Antp*), *Ultrabithorax* (*Ubx*), *abdominal A* (*abd-A*) and *Abdominal B* (*Abd-B*) – by means of the UAS-GAL4 system (Brand and Perrimon, 1993) (Fig. 1A; for

endogenous expression of Hox proteins see Fig. 1E). The Hox genes *labial (lab)* and *proboscipedia (pb)* were not included, as a similar study has been performed for *lab* (Leemans et al., 2001), and as *pb* mutant embryos do not exhibit any obvious defects (Wakimoto et al., 1984). We opted to use overexpression instead of a loss-of-function experiments for several reasons. First, the analysis of Hox mutants is complicated by the extensive crossregulatory interactions of Hox genes (Gould et al., 1997; Miller et al., 2001); loss of expression of one Hox gene often results in ectopic expression of other Hox genes, thereby obscuring the effects on downstream genes. Another important limitation of a loss-of-function approach in conjunction with microarray analysis is sensitivity; due to the small expression domains of many Hox genes (McGinnis and Krumlauf, 1992; Pearson et al., 2005), locally restricted differences in gene expression caused by Hox mutations will be diluted in RNA isolated from whole embryos, and therefore many downstream genes might not be detected. Isolation of cells expressing individual Hox genes by cell sorting (Wang et al., 2006) could provide a means to circumvent this problem; however, the required reporter genes that are expressed in specific Hox domains, although independent from Hox gene activity, currently do not exist. Conversely, although ectopic expression of one Hox gene affects the expression of other

Hox genes, their ubiquitous overexpression should allow us to even detect genes whose expression is only weakly, or locally, affected, because the Hox expression domains are expanded manyfold and consequently their transcriptional output is amplified. To achieve ubiquitous Hox overexpression in the desired stages of development, we used an *armadillo (arm)*-GAL4 driver line (Sansom et al., 1996), which confers ubiquitous expression starting at stage 10, as judged from analyzing GFP activity in embryos carrying an additional *UAS-2xEGFP* transgene (Fig. 1A). Previous studies have shown that ubiquitous overexpression of Hox genes in UAS fly strains, which were also used in our study, is sufficient to induce ectopic differentiation of Hox-dependent structures without affecting the development of early embryonic stages in an unspecific manner (Li et al., 1999). Thus, a substantial part of Hox downstream genes seem to be responsive to Hox signaling even at ectopic locations and should be detectable by microarray analysis.

One concern with overexpression experiments, however, is that they might result in varying or even unphysiological concentrations of transcription factor proteins in the nucleus, which might unspecifically affect gene expression. Therefore, we confirmed similar RNA and protein expression levels in our overexpression lines by qRT-PCR and antibody stainings (Fig. 1B,E). In addition,

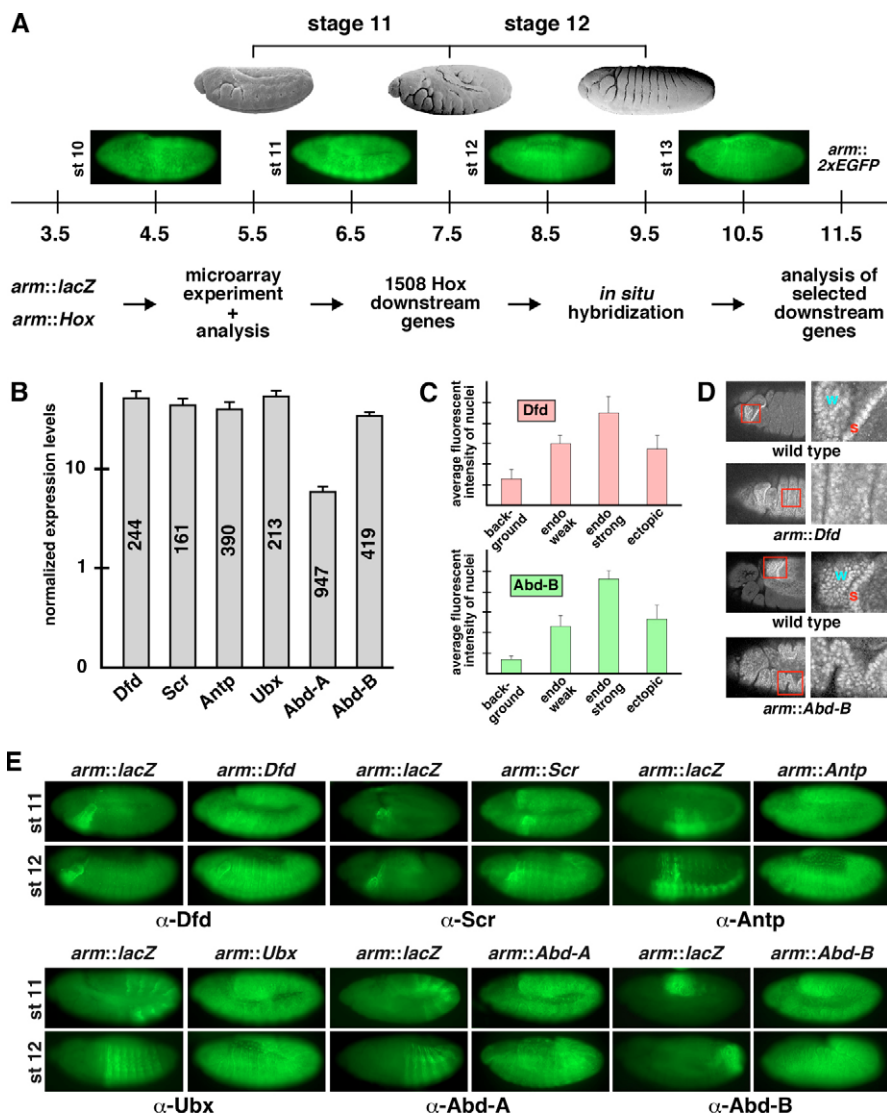

**Fig. 1. Identification of Hox downstream genes during early embryogenesis.**

(A) Outline of microarray analysis. Scanning electron micrographs of embryos at late stage 10-early stage 11, late stage 11-early stage 12, and late stage 12-early stage 13.

*arm::2xEGFP* embryos demonstrate ubiquitous transgene expression beginning at stage 10. Time scale shows hours of embryogenesis.

(B) Quantitative real-time PCR shows similar levels of overexpression of Dfd, Scr, Antp, Ubx, Abd-A and Abd-B transgenes. Numbers of genes regulated by the different Hox proteins are indicated.

(C) Average fluorescent intensity (in arbitrary units) of 20 independent nuclei at different locations in wild-type, *arm::Dfd* and *arm::Abd-B* embryos stained either with  $\alpha$ -Dfd or  $\alpha$ -Abd-B antibody.

Due to variable expression levels of endogenous Hox proteins, fluorescence from nuclei in different expression domains was measured (marked as 'endo weak' and 'endo strong').

(D) Representative embryo used for measuring fluorescent intensity of nuclei is shown. The upper two rows show wild-type and *arm::Dfd* embryos stained with  $\alpha$ -Dfd antibody, the lower two rows wild-type and *arm::Abd-B* embryos stained with  $\alpha$ -Abd-B antibody. Red boxes mark the areas used for fluorescence analysis.

s, strong endogenous expression domain; w, weak endogenous expression domain.

(E) Ubiquitous overexpression of Hox proteins in stage 11 and 12 was confirmed by antibody staining on *arm::lacZ* and *arm::Hox* embryos.

we quantified Dfd and Abd-B protein levels in the nuclei of wild-type and the respective overexpression embryos and found that protein levels in transgenic embryos were on the lower end of the wild-type expression spectrum (Fig. 1C,D). Thus, non-physiological effects of Hox misexpression due to increased protein levels should not interfere with our experiment.

For the microarray experiment, total RNA from *arm::lacZ* (control), *arm::Dfd*, *arm::Scr*, *arm::Antp*, *arm::Ubx*, *arm::abd-A* and *arm::Abd-B* embryos collected separately at the different stages was prepared and hybridized in biological triplicates to Affymetrix *Drosophila* Genome 1 arrays, which contains probe sets interrogating more than 13,500 genes. A combination of per-gene (Lemon et al., 2003) and common variance (>1.5-fold change) filtering was used to identify 1508 Hox responsive genes (Table S1, Table S2, Table S3, Table S4, Table S5 and Table S6 in the supplementary material). This list contained six of the 18 genes previously shown to be under Hox control during stages 11 and 12 (Fig. 2A), and in situ hybridizations for three of these transcripts confirmed the microarray results (Fig. 2A). The fact that we were only able to recover one-third of the known Hox targets can be explained by a number of differences between our experimental setup and the ones used before, such as detection method (Capovilla et al., 2001; Mahaffey et al., 1993), timing and level of overexpression (Feinstein et al., 1995), and use of mutants instead of overexpression (Mahaffey et al., 1993; Ryoo and Mann, 1999). Based on this observation, it is conceivable that the actual number of all Hox downstream genes is two- to threefold the number we have discovered in our study, which is still significantly lower than previously suggested (Liang and Biggin, 1998). The microarray data also showed that anterior Hox genes were repressed by those normally expressed more posteriorly (data not shown), a crossregulatory interaction known as posterior suppression (Miller et al., 2001). Again, we could confirm the microarray data by performing antibody stainings for all Hox proteins on embryos ubiquitously misexpressing either Dfd or Abd-B (Fig. 2B).

### Verification of Hox downstream genes identified in the microarray analysis

To verify differential expression of the newly identified genes at the cellular level, we carried out in situ hybridization on embryos misexpressing the various Hox genes (Fig. 3; see Fig. S1 in the supplementary material). Twenty-four of the 25 randomly selected genes that showed a specific in situ signal behaved as observed in the microarray experiment. In addition, for a selected subset of seven genes Hox-dependent regulation could also be shown in Hox mutants (Fig. 3), demonstrating the power of the initial microarray experiment. For example, three transcripts found to be induced by Dfd in the microarray experiment were *sickle* (*skl*), a known apoptosis activator (Wing et al., 2002), *CG5080*, a gene putatively involved in cytoskeletal regulation (Jasper et al., 2001), and *CG7447*, a gene of unknown function. In situ analysis confirmed strong and ectopic induction of all three genes in response to Dfd misexpression (Fig. 3B,F,J), and showed that their expression in the maxillary segment was lost in *Dfd* mutants (Fig. 3D,H,L). Similarly, mRNA levels of *salivary gland-expressed bHLH* (*sage*), a transcription factor gene exclusively expressed in the salivary gland primordium (Chandrasekaran and Beckendorf, 2003), were increased in response to ectopic *Scr* activity (Fig. 3N). By contrast, *sage* expression was abolished in *Scr* mutants (Fig. 3P), consistent with *Scr* being a master regulator of salivary gland morphogenesis (Panzer et al., 1992). Among the genes that were induced by Abd-B were *Ecdysone-inducible gene L2* (*ImpL2*), putatively involved

in cell adhesion (Garbe et al., 1993), and *spätzle* (*spz*), which encodes a Toll receptor ligand involved in embryonic axis specification (DeLotto et al., 2001). Again, we observed strong ectopic expression of *ImpL2* and *spz* in *arm::Abd-B* embryos (Fig. 3R,V), whereas expression in the posterior end was lost in *Abd-B* mutants (Fig. 3T,X). In summary, in situ hybridization with probes for 24 randomly selected genes (Fig. 3; see Fig. S1 in the supplementary material) not only confirmed the microarray results, but also demonstrated that many of the identified Hox downstream genes responded in a converse manner in the respective Hox mutants.

### Direct versus indirect Hox downstream genes

To understand the logic of Hox-dependent morphogenesis, it is important to place the newly identified downstream genes within the underlying regulatory hierarchy. To this end, we developed a bioinformatics tool to detect direct Hox target genes, based on the identification of evolutionarily conserved clusters of Hox consensus binding sites in the genome (see Materials and methods and Fig. S2 in the supplementary material for detail). Using this approach, we were able to identify a large number of putative direct targets of Dfd. From the 240 genes found to be significantly regulated by Dfd, 75 had clusters of Dfd-binding sites (31% of all identified Dfd responsive genes), which was significantly more than expected by chance ( $P < 0.001$ ). In addition, 46 of these clusters were well conserved in at least two other *Drosophila* species (19% of all identified Dfd responsive genes) (see Tables S7 and S8 in the supplementary material). Most of the predicted Dfd response elements also contained binding sites for other transcription factors (data not shown), a known prerequisite for functional enhancer elements (Berman et al., 2004). We randomly selected six of the 75 predicted Dfd response elements and performed EMSA to test whether Dfd protein could bind to these elements. All enhancer elements tested were bound by Dfd in vitro (Fig. 4), whereas Ubx, a Hox protein specifying trunk identity, was not able to interact with these enhancers (see Fig. S2C in the supplementary material). In addition, competition experiments showed that Dfd specifically bound some, but not all, of the predicted Dfd-binding sites in these enhancers (Fig. 4A-D), demonstrating that the simple presence of a consensus binding site is not sufficient for Dfd binding in the context of these enhancers in vitro and/or that some of the predicted sites are not functional in vivo. Based on our results with Dfd, it seems likely that about 20 to 30% of the identified downstream genes are direct Hox targets. In sum, the combination of microarray analysis with bioinformatics approaches will allow us in the future to not only identify direct Hox target genes, but also to construct complete Hox-regulatory networks.

### Specificity of Hox-dependent regulation

To assess the specificity of Hox gene regulation, the 1508 responsive genes were classified according to the number of Hox proteins that influenced their expression and the influence of the developmental stage. Remarkably, most downstream genes (1039, 68.9%) were affected by only a single Hox protein, with Abd-A having a very high proportion of unique response genes (two-thirds of its downstream genes were unique), whereas the fraction of unique response genes was smaller (18 to 36%) for the other Hox genes (Fig. 5A). The use of various statistical cut-offs showed that this result is not an artifact of arbitrary thresholding (data not shown). In addition, we were able to confirm the specificity of the Hox response by analyzing the expression of some of the unique downstream genes by in situ hybridizations in embryos misexpressing any of the

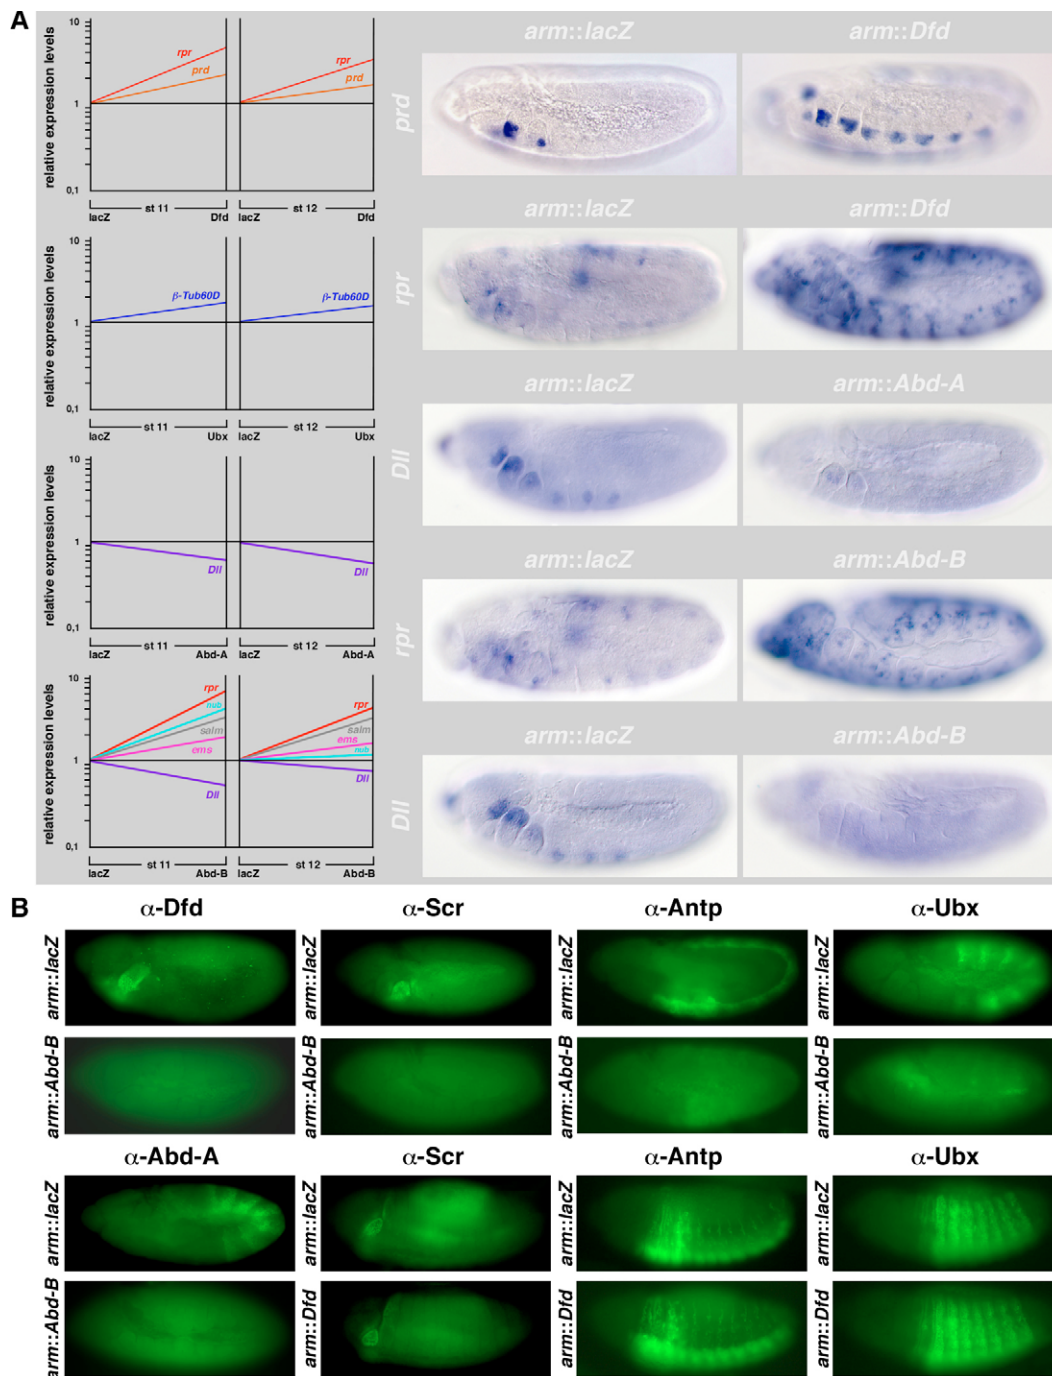

**Fig. 2. Verification of known Hox downstream genes identified by microarray analysis.** (A) Relative expression levels of seven known Hox downstream genes identified in a microarray screen are shown. For three of the seven genes, in situ hybridizations were performed. Genes shown are: *reaper* (*rpr*), *paired* (*prd*),  $\beta$ -Tubulin at 60D ( $\beta$ -Tub60D), *Distal-less* (*Dll*), *spalt major* (*salm*), *empty spiracles* (*ems*) and *nubbin* (*nub*). (B)  $\alpha$ -Dfd and  $\alpha$ -Abd-B antibody stainings on embryos misexpressing different Hox genes confirmed posterior suppression as seen in the microarray experiment. Antibody stainings for all (Abd-B misexpression) or for some (Dfd misexpression) Hox proteins are shown.

Hox genes (see Fig. S3 in the supplementary material). About one-third of the identified downstream genes (449, 29.8%) were affected by several Hox proteins, and only 20 genes (1, 3%) responded to all Hox proteins, representing the classes of regional and common downstream genes, respectively (Fig. 5A). Even when we excluded the Abd-A experiment, which was performed slightly differently from the rest of the set and therefore could interfere with this type of analysis, the result did not change: 63% of the genes were uniquely

regulated by only one Hox protein, 34.5% of the genes by some and 2.5% by all Hox proteins (Fig. 5A). Remarkably, among the predicted direct Dfd target genes the distribution of unique and regional Hox downstream genes was similar to their distribution among all identified Hox downstream genes (Fig. 5B). Taken together, these results indicate that the specific effects of Hox proteins on morphology are largely mediated by regulatory interactions with uniquely regulated downstream genes, and that

despite the very similar DNA-binding sequences for all Hox proteins observed *in vitro* (Ekker et al., 1994), the overlap of commonly regulated genes *in vivo* is relatively small.

To evaluate the influence of co-factors on the regulation of Hox downstream genes, we analyzed the Hox response at the two developmental stages. The idea was that overexpression of Hox genes remained the same, while the regulatory environment changed during the progression of embryogenesis. We found that most of the downstream genes were Hox responsive at either embryonic stage 11 or stage 12 (Fig. 5C,D), consistent with the hypothesis that Hox proteins strongly change their transcriptional output through the interaction with differentially expressed co-factors (Gebelein et al., 2004; Mahaffey, 2005; Merabet et al., 2005). To confirm stage-specific regulation of Hox downstream genes on a cellular level, we performed *in situ* hybridizations for some of the differentially expressed genes (Fig. 5D), and indeed found that most of these genes were Hox responsive primarily at one of the two stages (Fig. 5D).

### Functional classification and comparative analysis of Hox downstream genes

To group the newly identified Hox downstream genes functionally, we used Gene Ontology (GO) annotations (Fig. 6A) and analyzed the distribution of GO categories within the Hox-responsive genes. We found that the two major groups of Hox downstream genes encoded metabolic and realizator functions, followed by the

transcription or translation, signaling, transport, stress or defense response and DNA repair or replication classes (Fig. 6A). Supporting the significance of the realizator genes for the Hox response, we found that this group was the only class statistically over-represented among the Hox downstream genes by Fisher's exact test after Bonferoni correction ( $P < 0.001$ ). By contrast, the transcription or translation and transport classes were under-represented ( $P < 0.001$ ). Focusing on Dfd downstream genes, we also found that realizators were over-represented, whereas the transcription or translation functions were under-represented, albeit at weaker  $P$ -values. Intriguingly, even within the group of direct Dfd targets, the transcription or translation class was not over-represented. As sequence-specific transcription factors were never over-represented among any category tested, this suggests that the activation of regulatory proteins is not the preferred mode of Hox action. The fact that realizator processes at the same time are under direct as well as indirect Hox control demonstrates that Hox-dependent morphogenesis is indeed achieved by regulatory networks, rather than linear pathways. Furthermore, these results also argue against the idea that Hox genes mainly act on other transcription factors, a hypothesis that was based on the limited information on known direct Hox targets.

Since the realizator gene concept was postulated almost 30 years ago (Garcia-Bellido, 1975), but only a few such genes have previously been identified as Hox downstream genes in *Drosophila*, we decided to study this class of Hox response genes in more detail.

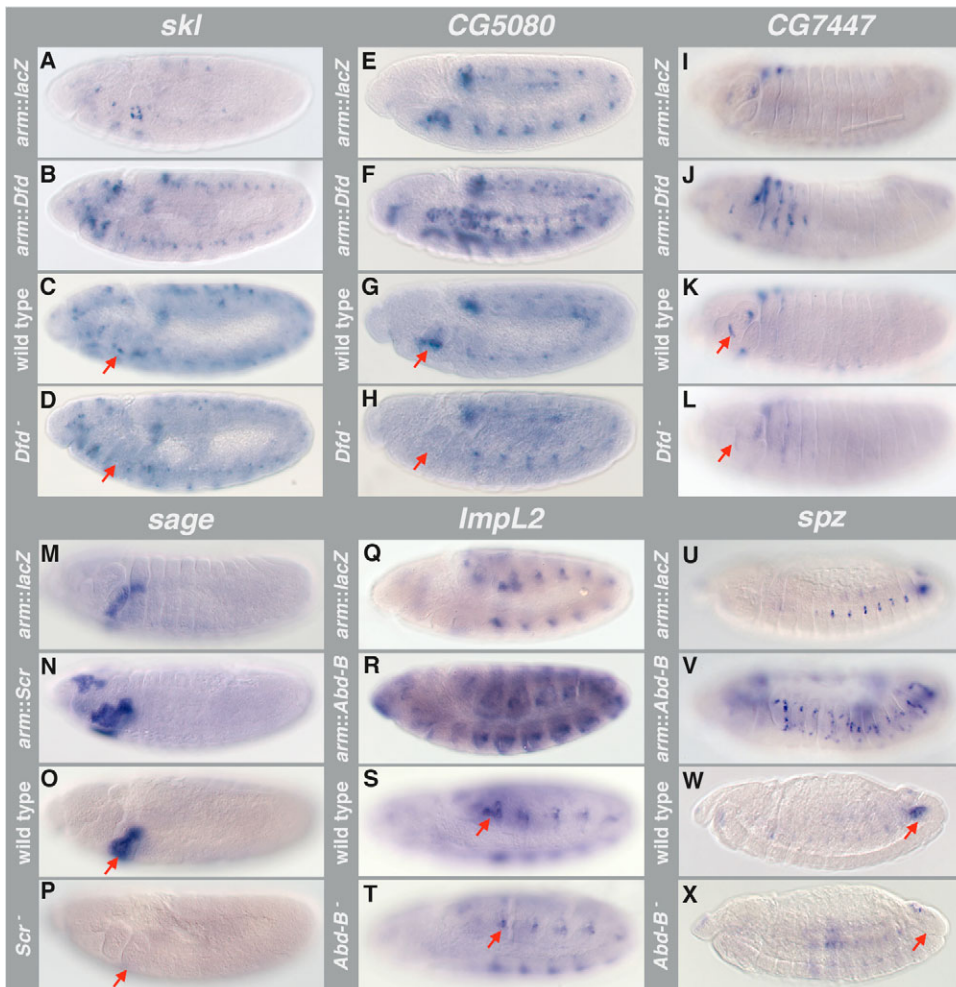

**Fig. 3. Verification of newly identified Hox downstream genes by *in situ* hybridization.** *In situ* hybridizations of the indicated genes in stage 11 and/or stage 12 *arm::lacZ*, *arm::Hox*, wild-type and *Hox* mutant embryos. Genes shown are: *skl* (A-D), *CG5080* (E-H), *CG7447* (I-L), *sage* (M-P), *ImpL2* (Q-T) and *spz* (U-X). Hybridizations on embryos misexpressing *Hox* genes and on *Hox* mutant embryos were performed independently (with the respective *arm::lacZ* and wild-type controls). Differences in staining intensities are due to differences in the *in situ* hybridization procedures. Pictures of *arm::lacZ* and wild-type embryos were taken at different focal planes and thus expression patterns in these embryos appear slightly different. Red arrows mark expression domains changed in wild-type and *Hox* mutant embryos.

Among the realizators, the largest subgroup comprises genes involved in proteolytic processes, followed by genes with cytoskeleton functions, a diverse group containing cuticle, chorion and peritrophic membrane genes, cell cycle or cell proliferation genes, apoptosis or cell death genes and cell adhesion genes (Fig. 6B). Genes within realizator subclasses are often coordinately regulated: most apoptotic (7/8) and cell cycle or proliferation genes (18/21) were activated, whereas almost all cell adhesion genes (12/14) and the majority of genes involved in proteolytic processes (56/75) were repressed by Hox proteins (Fig. 6C). Re-analyzing data from a more restricted microarray study, a similar trend can be identified for *lab*, another Hox gene (Leemans et al., 2001): one apoptotic gene and six cell cycle or cell proliferation genes were activated, whereas three cell adhesion genes were all repressed by *lab*. This suggests that a variety of cellular processes need to be regulated in a coordinated fashion in every segment in order to realize common aspects of segmental morphology. Support for this notion also comes from a previous analysis in *Drosophila*, showing that two Hox proteins, Dfd and Abd-B, locally activate the apoptosis gene *rpr* and thus the apoptotic machinery at segment boundaries for their maintenance (Lohmann et al., 2002).

Finally, we also wanted to analyze which role the identified Hox downstream genes play during the morphogenesis of segments. To this end, we first asked whether differences in morphology along the

AP axis are reflected in the differential regulation of Hox responsive genes. One line of evidence supporting this idea is that many downstream genes responded only to a single Hox protein (Fig. 5A). In addition, we found that coordinated regulation of shared downstream genes was more frequent among Hox proteins specifying segments with similar morphologies than among those that specify diverse segmental morphologies (Fig. 6D). For example, both Dfd and Scr specify small lobe-shaped gnathal segments and only 4% ( $n=2$ ) of their shared downstream genes are regulated in an opposite manner (Fig. 6D). One of the differentially regulated Dfd or Scr downstream genes is *PAPS synthetase*, which is repressed by Dfd and activated by Scr in our dataset (see Tables S1 and S2 in the supplementary material). Consistent with this observation, it had been shown that *PAPS synthetase* is specifically expressed in the salivary gland placodes in a Scr-dependent manner, while it is absent from Dfd-expressing cells in stage 11 and 12 embryos (Jullien et al., 1997). Another example for a strong correlation of differences in morphology and the differential regulation of shared downstream genes is the Scr-Abd-A pair. In this case, opposite regulation was found for 58% ( $n=55$ ) of the targets shared by Scr and Abd-A, in line with the very different morphologies specified by these two Hox proteins (Fig. 6D). Again, two selected examples, *pipe* and *PH4 $\alpha$ SG2*, both activated by Scr and repressed by Abd-A (see Table S2 and Table S5 in the supplementary material), are known to be expressed exclusively in the Scr-specified salivary glands at stages 11 and 12 (Abrams and Andrew, 2002; Zhu et al., 2005). Interestingly, it has been shown only recently that *pipe*, differentially regulated by Dfd and Abd-A, and *PAPS synthetase*, differentially regulated by Scr and Dfd in our microarray analysis, are both necessary for the production of sulfated macromolecules in the salivary glands of *Drosophila* embryos (Zhu et al., 2005). Thus, it seems that the diversification of segments is achieved, on the one hand, through the regulation of unique downstream genes, and, on the other hand, through the differential regulation of shared downstream genes.

### A framework for the morphogenesis of the maxillary segment

To analyze the morphogenetic function of Hox responsive genes in more detail, we focused on the potential role of several newly identified Dfd downstream genes during the development of the maxillary segment. It has long been known that Dfd is expressed in the maxillary and mandibular segments, and is necessary for the morphological specializations (mouth hooks, cirri, ventral organ) of these head segments (McGinnis et al., 1990). However, only a single cellular event necessary for the morphogenesis of the maxillary segment and under the control of Dfd has been explained mechanistically so far: the maintenance of the boundary between the maxillary and mandibular segments, which is dependent on Dfd-mediated activation of *rpr* expression in the anterior part of the maxillary segment (Lohmann et al., 2002). Consistently, *rpr* was found among the activated Dfd downstream genes in our microarray analysis (see Table S1 in the supplementary material). Another prominent feature of *Dfd* mutants is the displacement of maxillary and mandibular segments to a more dorsal position, caused by the accumulation of supernumerary cells at the ventral side of both segments, which had been observed almost 20 years ago (Fig. 7B) (Regulski et al., 1987). There are two alternative explanations for this defect: loss of cell death and/or overactivation of cell proliferation. Consistent with the former explanation, we observed reduced local expression of the apoptosis activator *skl* (Fig. 7K,P), one of the newly identified genes activated by Dfd, and a concurrent

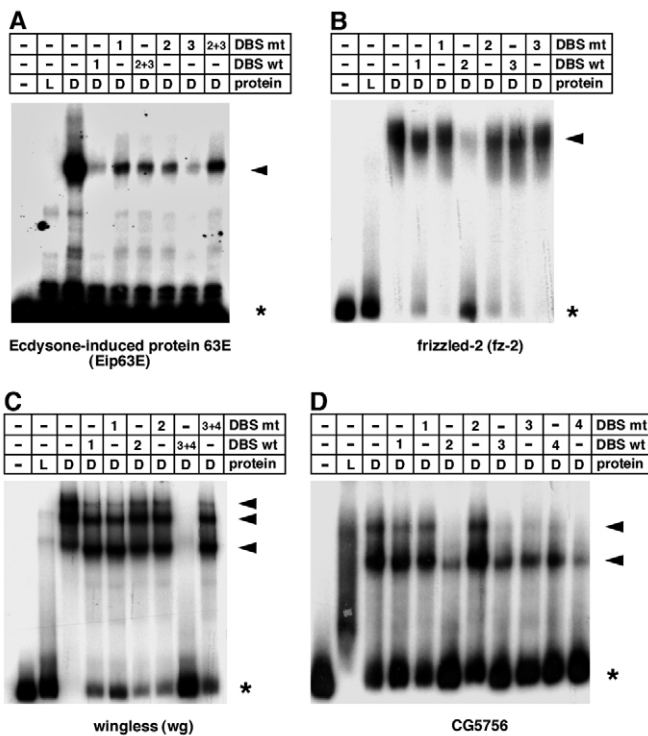

**Fig. 4. Confirmation of predicted direct Dfd downstream genes by EMSA.** (A-D) EMSA for four predicted direct Dfd downstream genes tested using no protein, translation lysate only (L) and lysate with Dfd protein (D). To test the specificity of binding of Dfd protein to the DNA fragments, competitor oligonucleotides for the individual Dfd-binding sites (DBS) were used either in their wild-type (wt) or mutant (mt) sequence versions. The black arrowhead indicates the specific DNA-protein complex containing Dfd protein. Asterisks indicate the unbound labeled probe. Predicted Dfd response enhancers of the following genes were used: *Eip63E* (A), *frizzled 2* (*fz2*) (B), *wg* (C) and *CG5756* (D).

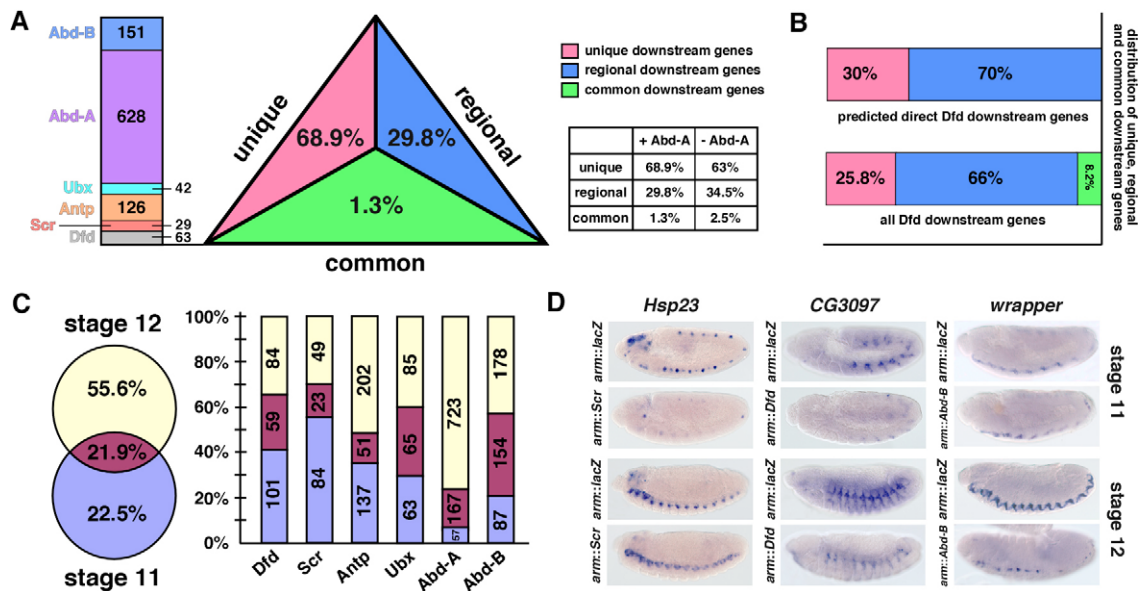

**Fig. 5. Specificity of Hox downstream gene regulation.** (A) Classification of Hox downstream genes according to their regulation by one (unique), several (regional) and all (common) Hox proteins. Numbers of unique downstream genes for each Hox protein are shown on the left. The distribution of classes does not change when the Abd-A experiment, which was performed independently, is excluded from the analysis (shown in the table). (B) Distribution of the regulatory classes among all identified Dfd downstream genes and predicted direct Dfd target genes is very similar. No commonly regulated downstream genes are found among the predicted direct Dfd target genes. (C) Distribution of Hox downstream genes regulated at the two different stages analyzed. On the left side, the percentage of all Hox downstream genes regulated at the two stages are shown; on the right side, the distribution for each individual Hox protein is indicated. Numbers of genes are shown within bars. (D) In situ hybridizations of selected examples of genes regulated at specific stages (early-specific, early and late, late-specific). Expression patterns of the following genes are displayed: *Heat shock protein 23 (Hsp23)*, *CG3097* and *wrapper*.

reduction in the number of apoptotic cells at the ventral side of the maxillary segment in *Dfd* mutants (data not shown) (Lohmann et al., 2002). Additionally, we were able to show that cell proliferation at the ventral region of the maxillary segment is increased in *Dfd* mutant embryos by performing BrdU labeling experiments (Fig. 7E,J). This might be attributed to the de-repression of two genes identified as repressed by Dfd in this study (see Table S1 in the supplementary material): *Ecdysone-induced protein 63E (Eip63E)*, encoding a cyclin-dependent protein kinase (Stowers et al., 2000), and *wingless (wg)*, encoding a signaling molecule known to play a role in cell proliferation (Giraldez and Cohen, 2003). In line with a role of these genes in shaping the maxillary segment, we found that both genes are ectopically expressed in the dorsal part of the maxillary segment in *Dfd* mutants (Fig. 7Q,R). Although the function of *Eip63E* during the morphogenesis of the maxillary segment could not be analyzed due to the lack of mutants, we could confirm that *wg* mutants have reduced gnathal lobes (Fig. 7D) (Rusch and Kaufman, 2000), suggesting an important role of *wg* in the regulation of cell proliferation in the maxillary segment. The third notable defect of *Dfd* mutants is the loss of the maxillary cirri primordium (Regulski et al., 1987). *paired (prd)*, one of the transcription factor genes identified in our screen (see Table S1 in the supplementary material), is known to be important for development of cirri and the maxillary ventral organ (Vanario-Alonso et al., 1995). Because late *prd* expression is completely under the control of Dfd (Fig. 7N,S), we conclude that some aspects of ventral maxillary identity are specified by Dfd via *prd* regulation. Finally, we analyzed Dfd-dependent regulation of cell shape changes, because cells at ventral positions of wild-type maxillary segments are round (Fig. 7G), whereas in *Dfd* mutants many

appeared elongated (Fig. 7H). The JNK pathway has been implicated in cell shape changes in *Drosophila*, for example during embryonic dorsal closure and adult thorax closure (Harden, 2002; Xia and Karin, 2004) and because we had identified several genes responsive to the JNK pathway (Jasper et al., 2001) [*Ras-related protein (Rala)*, *Angiotensin converting enzyme (Ance)* and *CG5080*] (see Table S1 in the supplementary material) as Dfd downstream genes, we tested the contribution of the JNK pathway to the cell shape phenotype of *Dfd* mutants. After ubiquitous activation of the JNK pathway by overexpressing a constitutively active form of Hemipterous (Weber et al., 2000) using the *arm*-GAL4 driver, we observed elongated cells in the maxillary segment (Fig. 7I), as well as in other parts of the embryo (data not shown). As we could confirm for one of the JNK-responsive Dfd downstream genes, *CG5080*, implicated in the regulation of cytoskeletal dynamics (Jasper et al., 2001), strong upregulation by Dfd (Fig. 7T), we conclude that the JNK pathway plays a major role in organizing cell shapes in the maxillary segment.

## DISCUSSION

More than 30 years ago Antonio Garcia-Bellido proposed that a hierarchy of three classes of genes, activators, selectors and realizators, accounts for cell differentiation during development, thereby providing a functional scheme for the control of morphogenetic processes. The key proposal was that, once activated in their appropriate territories by so-called activator genes, selector genes (he applied this name to homeotic genes) would not directly specify morphological differences between different segments, but would rather select a battery of subordinate downstream genes, the realizator genes, encoding cellular proteins directly required in cell



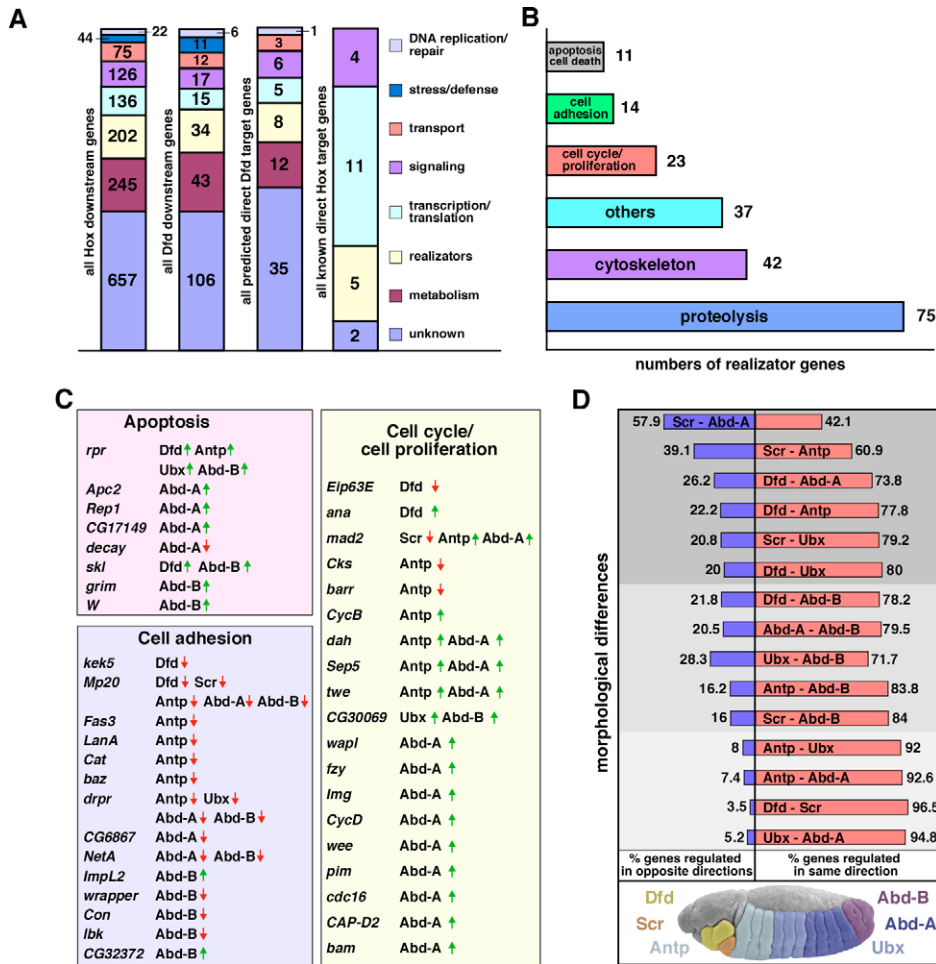

**Fig. 6. Functional classification of Hox downstream genes using GO categories.**

(A) Functional categories of downstream genes are shown for all newly identified Hox downstream genes (first column), for all identified Dfd downstream genes (second column), for all predicted direct Dfd target genes (third column) and for all known direct Hox target genes (fourth column). Numbers of genes for each category are indicated within bars. (B) Diagram showing subclasses of realizator genes, with numbers of genes for each class indicated. (C) Subclasses of realizators are often coordinately regulated, as shown here by three examples (apoptosis, cell adhesion, cell cycle or cell proliferation). Green arrows, increased expression; red arrows, reduced expression.

(D) Morphological differences along the AP axis are reflected in the percentage of shared downstream genes regulated oppositely by two different Hox proteins. Light gray indicates similar morphologies; medium gray and dark gray indicate increasing differences in morphologies directed by the Hox genes compared. The scanning electron micrograph shows the morphology of a stage 13 embryo, with the expression domains of the different Hox proteins highlighted.

differentiation processes (Garcia-Bellido, 1975). Until now much effort has gone into elucidating the nature and function of all three hierarchical levels, with a substantial amount of knowledge having accumulated at the activator and selector level. It is now well established that a genetic cascade comprising maternal and various classes of segmentation genes regulate the temporal and spatial expression of a unique combination of Hox genes in different segments, which subsequently specifies the identities of individual segments (McGinnis and Krumlauf, 1992; St Johnston and Nusslein-Volhard, 1992). Additionally, the discovery that Hox proteins act as transcriptional regulators established the general view that each segment will enter a specific morphogenetic program and develop unique shape and function depending on Hox downstream genes, in particular the realizator genes. Although the question of Hox downstream gene identity and function is not a novel problem, and although a considerable amount of progress has been made in recent years, our knowledge of their nature and function is still far from complete, especially with regard to the realizator genes in the sense of Garcia-Bellido.

Many of the known Hox downstream genes coded either for transcription factors or signaling molecules, and only very few of them were realizators (Hombria and Lovegrove, 2003; Pearson et al., 2005; Pradel and White, 1998). This was puzzling, as the primary function of Hox proteins is to specify the morphology of different segments, thus one would have expected to find a bias toward realizators. Moreover, this finding established the view that most of the cellular responses mediated by Hox proteins, including

realizator functions, are indirectly influenced through the action of intermediate regulatory molecules. Our analysis of Hox downstream genes in *Drosophila*, which was designed to allow for a quantitative identification of Hox-regulatory networks (including most realizator genes), revealed that a major group of genes responsive to Hox input did indeed code for realizators. Therefore, our results constitute the first experimental support of the concept postulated by Garcia-Bellido more than three decades ago. We could furthermore show that a substantial part of the Hox output is directly transferred to the realizator level, suggesting that intermediate regulators might play a smaller role than previously thought. One possible explanation why so few Hox realizators had been identified before is that most realizators will be required for general functions in many cells. Consequently, mutations in realizator genes are likely to result either in early embryonic lethality or in pleiotropic effects, making it difficult to correlate their phenotypes to those found in Hox mutants. In addition, it seems likely that realizators act redundantly or have very subtle effects, making their identification in forward genetic screens extremely difficult. Similarly, individual mutations in all known guidance factors for border cell migration in *Drosophila* produce either no, or only mild, defects and thus they could be identified only by expression profiling studies (Wang et al., 2006). In this study we have quantitatively identified Hox realizator genes by a comparative microarray analysis, which now can serve as a resource to study the mechanisms of segmental morphogenesis. Focusing on the differentiation of the maxillary segment, we were able to functionally correlate all major morphological defects

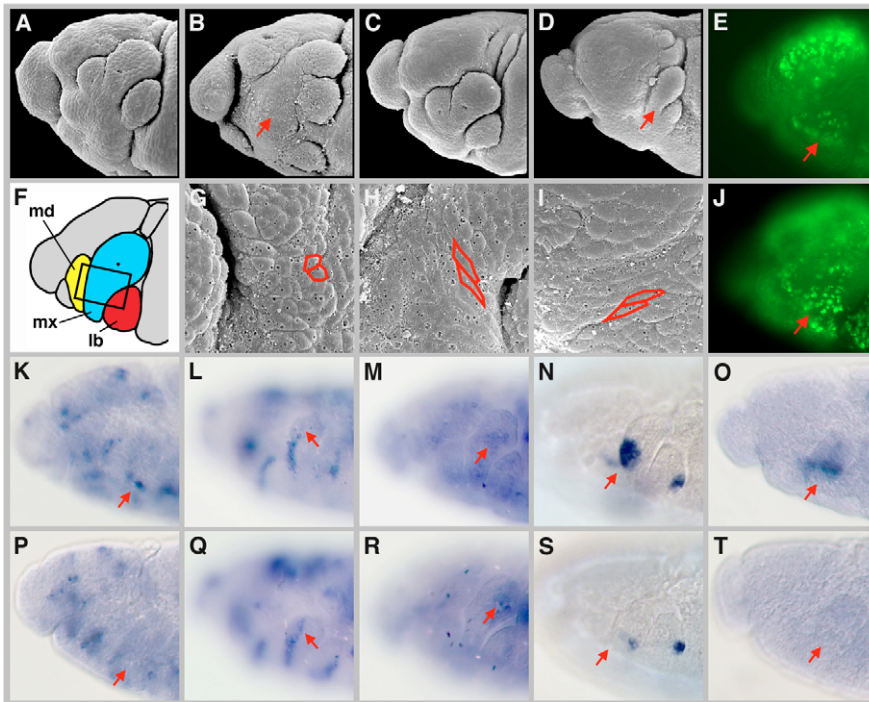

**Fig. 7. A framework for the morphogenesis of the maxillary segment in *Drosophila*.** (A,C) Scanning electron micrographs of heads of stage 12 wild-type embryos. (B) Head of a stage 12 *Dfd* mutant embryo. The red arrow marks additional cells at the ventral side of the maxillary segment. (D) Head of a *wg* mutant embryo. The red arrow marks the size-reduced maxillary segment. (E,J) BrdU labeling of stage 12 wild-type and *Dfd* mutant embryos, respectively. Red arrows mark proliferating BrdU-positive cells at the ventral side of the maxillary segment. (F) Diagram of a stage 12 wild-type embryo. Mandibular (md), maxillary (mx) and labial (lb) segments are indicated; the box marks the area shown in G,H,I. (G,H,I) In stage 12 wild-type embryos, cells in the ventral part of the maxillary segment are round (G), whereas in *Dfd* mutant (H) and *arm::hep<sup>act</sup>* (I) embryos, cells are elongated (marked in red). (K-T) *skl* (K,P), *wg* (L,Q), *Eip63E* (M,R), *prd* (N,S) and *CG5080* (O,T) RNA expression in wild-type and *Dfd* mutant embryos, respectively. The red arrows indicate the expression of the respective genes that differs in wild-type and *Dfd* mutant embryos.

observed in *Dfd* mutants with newly identified *Dfd* downstream genes, many of which code for realizators, demonstrating the validity of this approach.

Another important discovery of our analysis is the enormous specificity of Hox protein action on the transcriptome in vivo, which sharply contrasts with the low DNA-binding specificity in vitro. Hox proteins have been shown to bind to very similar, relatively simple, DNA sequences containing a TAAT core sequence in vitro (Biggin and McGinnis, 1997; Carr and Biggin, 1999; Ekker et al., 1994; Walter and Biggin, 1996), whereas many of the identified Hox downstream genes are uniquely regulated by only a single Hox protein. This contrast may be explained by our observation that the majority of genes are primarily regulated at only one of the two stages, implicating that Hox proteins excessively interact with the regulatory environment in which they are embedded. Support for the notion that co-factor interactions have a major impact on Hox output also comes from a recent study, which has provided direct evidence that Hox proteins gain the ability to regulate their target genes in a context-specific manner by interaction with known cell- and/or tissue-specific transcription factors in vivo (Gebelein et al., 2004). In addition, this study also suggests that a large number of transcription factors might function as Hox co-factors, which could dictate the outcome of Hox gene action. Along these lines, we found that ubiquitous overexpression of Hox proteins never caused ubiquitous activation of downstream genes, but that ectopic expression was always locally restricted, suggesting that regional transcription factors are essential for Hox output. This is also reflected in our finding that conserved clusters of Hox binding sites in the regulatory regions of direct targets frequently contain binding sites for unrelated transcription factors. Taken together, these results support the hypothesis put forward by Michael Akam in 1998, that “we should think of the Hox genes with their short and relatively non-specific target sequences, as cofactors that modify the actions of other more specific transcription factors, rather than proteins in need of cofactors themselves” (Akam, 1998).

We thank Jan U. Lohmann for help with the microarray analysis and quantitative real-time PCR, Benjamin Berman for receiving the stand-alone binaries and support for Cis-analyst, Tancred Frickey for help with gene annotations, Jürgen Berger for advice with the SEMs, Stephan Ossowski for help with databases, Petra Stöbe for assistance with gelshifts and Jan U. Lohmann and Detlef Weigel for discussion and for critically reading the manuscript. Supported by the Deutsche Forschungsgemeinschaft (I.L.; LO 844/3-1) and by the Max Planck Society.

#### Supplementary material

Supplementary material for this article is available at <http://dev.biologists.org/cgi/content/full/134/2/381/DC1>

#### References

- Abouelhoda, M. I., Kurtz, S. and Ohlebusch, E. (2002). The enhanced suffix array and its applications to genome analysis. In *Algorithms in Bioinformatics: Second International Workshop, WABI, Rome, Italy 17-21, 2002, Proceedings (Lecture Notes in Computer Science)*. Vol. 2452 (ed. G. Goos, J. Hartmanis and J. van Leeuwen), pp. 449-463. Berlin, Heidelberg: Springer Verlag.
- Abrams, E. W. and Andrew, D. J. (2002). Prolyl 4-hydroxylase alpha-related proteins in *Drosophila melanogaster*: tissue-specific embryonic expression of the 99F8-9 cluster. *Mech. Dev.* **112**, 165-171.
- Akam, M. (1998). Hox genes: from master genes to micromanagers. *Curr. Biol.* **8**, R676-R678.
- Bello, B. C., Hirth, F. and Gould, A. P. (2003). A pulse of the *Drosophila* Hox protein Abdominal-A schedules the end of neural proliferation via neuroblast apoptosis. *Neuron* **37**, 209-219.
- Bergman, C. M., Carlson, J. W. and Celniker, S. E. (2005). *Drosophila* DNase I footprint database: a systematic genome annotation of transcription factor binding sites in the fruitfly, *Drosophila melanogaster*. *Bioinformatics* **21**, 1747-1749.
- Bergson, C. and McGinnis, W. (1990). An autoregulatory enhancer element of the *Drosophila* homeotic gene *Deformed*. *EMBO J.* **9**, 4287-4297.
- Berman, B. P., Pfeiffer, B. D., Laverty, T. R., Salzberg, S. L., Rubin, G. M., Eisen, M. B. and Celniker, S. E. (2004). Computational identification of developmental enhancers: conservation and function of transcription factor binding-site clusters in *Drosophila melanogaster* and *Drosophila pseudoobscura*. *Genome Biol.* **5**, R61.
- Biggin, M. D. and McGinnis, W. (1997). Regulation of segmentation and segmental identity by *Drosophila* homeoproteins: the role of DNA binding in functional activity and specificity. *Development* **124**, 4425-4433.
- Brand, A. H. and Perrimon, N. (1993). Targeted gene expression as a means of altering cell fates and generating dominant phenotypes. *Development* **118**, 401-415.
- Capovilla, M., Kambris, Z. and Botas, J. (2001). Direct regulation of the muscle-

- identity gene apterous by a Hox protein in the somatic mesoderm. *Development* **128**, 1221-1230.
- Carr, A. and Biggin, M. D.** (1999). A comparison of *in vivo* and *in vitro* DNA-binding specificities suggests a new model for homeoprotein DNA binding in *Drosophila* embryos. *EMBO J.* **18**, 1598-1608.
- Carroll, S. B.** (1995). Homeotic genes and the evolution of arthropods and chordates. *Nature* **376**, 479-485.
- Chandrasekaran, V. and Beckendorf, S. K.** (2003). senseless is necessary for the survival of embryonic salivary glands in *Drosophila*. *Development* **130**, 4719-4728.
- Cobb, J. and Duboule, D.** (2005). Comparative analysis of genes downstream of the *Hoxd* cluster in developing digits and external genitalia. *Development* **132**, 3055-3067.
- DeLotto, Y., Smith, C. and DeLotto, R.** (2001). Multiple isoforms of the *Drosophila* Spatzle protein are encoded by alternatively spliced maternal mRNAs in the precellular blastoderm embryo. *Mol. Gen. Genet.* **264**, 643-652.
- Dolbeare, F. and Selden, J. R.** (1994). Immunochemical quantitation of bromodeoxyuridine application to cell-cycle kinetics. *Methods Cell Biol.* **41**, 297-316.
- Ebner, A., Cabernard, C., Affolter, M. and Merabet, S.** (2005). Recognition of distinct target sites by a unique Labial/Extradenticle/Homothorax complex. *Development* **132**, 1591-1600.
- Ekker, S. C., Jackson, D. G., von Kessler, D. P., Sun, B. I., Young, K. E. and Beachy, P. A.** (1994). The degree of variation in DNA sequence recognition among four *Drosophila* homeotic proteins. *EMBO J.* **13**, 3551-3560.
- Feinstein, P. G., Kornfeld, K., Hogness, D. S. and Mann, R. S.** (1995). Identification of homeotic target genes in *Drosophila melanogaster* including *nerve*, a proto-oncogene homologue. *Genetics* **140**, 573-586.
- Garbe, J. C., Yang, E. and Fristrom, J. W.** (1993). IMP-L2: an essential secreted immunoglobulin family member implicated in neural and ectodermal development in *Drosophila*. *Development* **119**, 1237-1250.
- Garcia-Bellido, A.** (1975). Genetic control of wing disc development in *Drosophila*. *Ciba Found. Symp.* **29**, 161-182.
- Gebelein, B., McKay, D. J. and Mann, R. S.** (2004). Direct integration of Hox and segmentation gene inputs during *Drosophila* development. *Nature* **431**, 653-659.
- Giraldez, A. J. and Cohen, S. M.** (2003). Wingless and Notch signaling provide cell survival cues and control cell proliferation during wing development. *Development* **130**, 6533-6543.
- Gould, A., Morrison, A., Sproat, G., White, R. A. and Krumlauf, R.** (1997). Positive cross-regulation and enhancer sharing: two mechanisms for specifying overlapping Hox expression patterns. *Genes Dev.* **11**, 900-913.
- Graba, Y., Aragnol, D. and Pradel, J.** (1997). *Drosophila* Hox complex downstream targets and the function of homeotic genes. *BioEssays* **19**, 379-388.
- Harden, N.** (2002). Signaling pathways directing the movement and fusion of epithelial sheets: lessons from dorsal closure in *Drosophila*. *Differentiation* **70**, 181-203.
- Hedlund, E., Karsten, S. L., Kudo, L., Geschwind, D. H. and Carpenter, E. M.** (2004). Identification of a Hoxd10-regulated transcriptional network and combinatorial interactions with Hoxa10 during spinal cord development. *J. Neurosci. Res.* **75**, 307-319.
- Hirth, F., Loop, T., Egger, B., Miller, D. F., Kaufman, T. C. and Reichert, H.** (2001). Functional equivalence of Hox gene products in the specification of the tritocerebrum during embryonic brain development of *Drosophila*. *Development* **128**, 4781-4788.
- Hombria, J. C. and Lovegrove, B.** (2003). Beyond homeosis – HOX function in morphogenesis and organogenesis. *Differentiation* **71**, 461-476.
- Jasper, H., Benes, V., Schwager, C., Sauer, S., Clauder-Munster, S., Ansoerge, W. and Bohmann, D.** (2001). The genomic response of the *Drosophila* embryo to JNK signaling. *Dev. Cell* **1**, 579-586.
- Jullien, D., Crozatier, M. and Kas, E.** (1997). cDNA sequence and expression pattern of the *Drosophila melanogaster* PAPS synthetase gene: a new salivary gland marker. *Mech. Dev.* **68**, 179-186.
- Leemans, R., Loop, T., Egger, B., He, H., Kammermeier, L., Hartmann, B., Certa, U., Reichert, H. and Hirth, F.** (2001). Identification of candidate downstream genes for the homeodomain transcription factor Labial in *Drosophila* through oligonucleotide-array transcript imaging. *Genome Biol.* **2**, RESEARCH0015.
- Lei, H., Wang, H., Juan, A. H. and Ruddle, F. H.** (2005). The identification of Hoxc8 target genes. *Proc. Natl. Acad. Sci. USA* **102**, 2420-2424.
- Lemon, W. J., Liyanarachchi, S. and You, M.** (2003). A high performance test of differential gene expression for oligonucleotide arrays. *Genome Biol.* **4**, R67.
- Lewis, E. B.** (1978). A gene complex controlling segmentation in *Drosophila*. *Nature* **276**, 565-570.
- Li, X., Murre, C. and McGinnis, W.** (1999). Activity regulation of a Hox protein and a role for the homeodomain in inhibiting transcriptional activation. *EMBO J.* **18**, 198-211.
- Liang, Z. and Biggin, M. D.** (1998). Eve and ftz regulate a wide array of genes in blastoderm embryos: the selector homeoproteins directly or indirectly regulate most genes in *Drosophila*. *Development* **125**, 4471-4482.
- Lohmann, I., McGinnis, N., Bodmer, M. and McGinnis, W.** (2002). The *Drosophila* Hox gene *Deformed* sculpts head morphology via direct regulation of the apoptosis activator *reaper*. *Cell* **110**, 457-466.
- Mahaffey, J. W.** (2005). Assisting Hox proteins in controlling body form: are there new lessons from flies (and mammals)? *Curr. Opin. Genet. Dev.* **15**, 422-429.
- Mahaffey, J. W., Jones, D. F., Hickel, J. A. and Griswold, C. M.** (1993). Identification and characterization of a gene activated by the Deformed homeoprotein. *Development* **118**, 203-214.
- Mann, R. S.** (1995). The specificity of homeotic gene function. *BioEssays* **17**, 855-863.
- Mann, R. S. and Affolter, M.** (1998). Hox proteins meet more partners. *Curr. Opin. Genet. Dev.* **8**, 423-429.
- Mann, R. S. and Morata, G.** (2000). The developmental and molecular biology of genes that subdivide the body of *Drosophila*. *Annu. Rev. Cell Dev. Biol.* **16**, 243-271.
- McGinnis, W. and Krumlauf, R.** (1992). Homeobox genes and axial patterning. *Cell* **68**, 283-302.
- McGinnis, W., Levine, M. S., Hafen, E., Kuroiwa, A. and Gehring, W. J.** (1984). A conserved DNA sequence in homeotic genes of the *Drosophila Antennapedia* and *bithorax* complexes. *Nature* **308**, 428-433.
- McGinnis, W., Jack, T., Chadwick, R., Regulski, M., Bergson, C., McGinnis, N. and Kuziora, M. A.** (1990). Establishment and maintenance of position-specific expression of the *Drosophila* homeotic selector gene *Deformed*. *Adv. Genet.* **27**, 363-402.
- Merabet, S., Pradel, J. and Graba, Y.** (2005). Getting a molecular grasp on Hox contextual activity. *Trends Genet.* **21**, 477-480.
- Michelson, A. M.** (1994). Muscle pattern diversification in *Drosophila* is determined by the autonomous function of homeotic genes in the embryonic mesoderm. *Development* **120**, 755-768.
- Miller, D. F., Rogers, B. T., Kalkbrenner, A., Hamilton, B., Holtzman, S. L. and Kaufman, T.** (2001). Cross-regulation of Hox genes in the *Drosophila melanogaster* embryo. *Mech. Dev.* **102**, 3-16.
- Panzer, S., Weigel, D. and Beckendorf, S. K.** (1992). Organogenesis in *Drosophila melanogaster*: embryonic salivary gland determination is controlled by homeotic and dorsoventral patterning genes. *Development* **114**, 49-57.
- Pearson, J. C., Lemons, D. and McGinnis, W.** (2005). Modulating Hox gene functions during animal body patterning. *Nat. Rev. Genet.* **6**, 893-904.
- Pradel, J. and White, R. A.** (1998). From selectors to realizers. *Int. J. Dev. Biol.* **42**, 417-421.
- Regulski, M., McGinnis, N., Chadwick, R. and McGinnis, W.** (1987). Developmental and molecular analysis of *Deformed*: a homeotic gene controlling *Drosophila* head development. *EMBO J.* **6**, 767-777.
- Rusch, D. B. and Kaufman, T. C.** (2000). Regulation of *proboscipedia* in *Drosophila* by homeotic selector genes. *Genetics* **156**, 183-194.
- Ryoo, H. D. and Mann, R. S.** (1999). The control of trunk Hox specificity and activity by Extradenticle. *Genes Dev.* **13**, 1704-1716.
- Sanson, B., White, P. and Vincent, J. P.** (1996). Uncoupling cadherin-based adhesion from wingless signalling in *Drosophila*. *Nature* **383**, 627-630.
- Schmid, M., Uhlenhaut, N. H., Godard, F., Demar, M., Bressan, R., Weigel, D. and Lohmann, J. U.** (2003). Dissection of floral induction pathways using global expression analysis. *Development* **130**, 6001-6012.
- Scott, M. P. and Weiner, A. J.** (1984). Structural relationships among genes that control development: sequence homology between the *Antennapedia*, *Ultrabithorax*, and *fushi tarazu* loci of *Drosophila*. *Proc. Natl. Acad. Sci. USA* **81**, 4115-4119.
- St Johnston, D. and Nusslein-Volhard, C.** (1992). The origin of pattern and polarity in the *Drosophila* embryo. *Cell* **68**, 201-219.
- Stowers, R. S., Garza, D., Rasclé, A. and Hogness, D. S.** (2000). The L63 gene is necessary for the ecdysone-induced 63E late puff and encodes CDK proteins required for *Drosophila* development. *Dev. Biol.* **221**, 23-40.
- Tautz, D. and Pfeifle, C.** (1989). A non-radioactive *in situ* hybridization method for the localization of specific RNAs in *Drosophila* embryos reveals translational control of the segmentation gene *hunchback*. *Chromosoma* **98**, 81-85.
- Vanario-Alonso, C. E., O'Hara, E., McGinnis, W. and Pick, L.** (1995). Targeted ribozymes reveal a conserved function of the *Drosophila paired* gene in sensory organ development. *Mech. Dev.* **53**, 323-328.
- Wakimoto, B. T., Turner, F. R. and Kaufman, T. C.** (1984). Defects in embryogenesis in mutants associated with the antennapedia gene complex of *Drosophila melanogaster*. *Dev. Biol.* **102**, 147-172.
- Walter, J. and Biggin, M. D.** (1996). DNA binding specificity of two homeodomain proteins *in vitro* and in *Drosophila* embryos. *Proc. Natl. Acad. Sci. USA* **93**, 2680-2685.
- Wang, X., Bo, J., Bridges, T., Dugan, K. D., Pan, T. C., Chodosh, L. A. and Montell, D. J.** (2006). Analysis of cell migration using whole-genome expression profiling of migratory cells in the *Drosophila* ovary. *Dev. Cell* **10**, 483-495.
- Weber, U., Paricio, N. and Mlodzik, M.** (2000). Jun mediates Frizzled-induced R3/R4 cell fate distinction and planar polarity determination in the *Drosophila* eye. *Development* **127**, 3619-3629.
- Williams, T. M., Williams, M. E., Kuick, R., Miské, D., McDonagh, K., Hanash,**

- S. and Innis, J. W.** (2005). Candidate downstream regulated genes of HOX group 13 transcription factors with and without monomeric DNA binding capability. *Dev. Biol.* **279**, 462-480.
- Wing, J. P., Karres, J. S., Ogdahl, J. L., Zhou, L., Schwartz, L. M. and Nambu, J. R.** (2002). *Drosophila sickle* is a novel grim-reaper cell death activator. *Curr. Biol.* **12**, 131-135.
- Wu, Z., Irizarry, R. A., Gentleman, R., Murillo, F. M. and Spencer, F. A. A.** (2004). A model based background adjustment for oligonucleotide expression arrays. Working paper 1. <http://www.bepress.com/jhbiostat/paper1>.
- Xia, Y. and Karin, M.** (2004). The control of cell motility and epithelial morphogenesis by Jun kinases. *Trends Cell Biol.* **14**, 94-101.
- Zhu, X., Sen, J., Stevens, L., Goltz, J. S. and Stein, D.** (2005). *Drosophila* pipe protein activity in the ovary and the embryonic salivary gland does not require heparan sulfate glycosaminoglycans. *Development* **132**, 3813-3822.
